# Supplementary material
Source: Springer Nature journal article supplement (https://www.springermedizin.de/resource/supplementary/12936_2010_1301_MOESM4_ESM.pdf/9549444)

### Plasmas UM

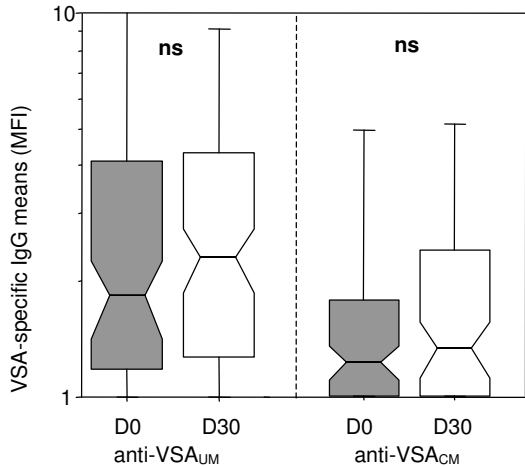

### Plasmas CM

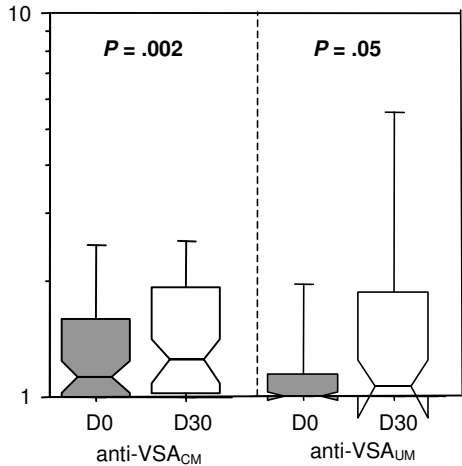

Supplement: MOESM4 [file 9549444]
